# Supplementary material for: Learning to filter: Snow data assimilation using a Long Short-Term Memory network
Source: Copernicus journal article supplement (doi:10.5194/egusphere-2025-423), 2025-02-12
Supplement: Supplementary file [file egusphere-2025-423-AC1-supplement.pdf]

## General comment

*This work developed a surrogate for EnKF-DA using an LSTM network. The introduction and methods sections are well written and structured. However, there are several errors in the results that are inconsistent with the plots. More importantly, the results lack sufficient explanation and analysis regarding why the LSTM performs differently from EnKF at different sites or scenarios. The discussion could benefit from additional comparisons with previous studies and a deeper analysis of the results. Currently, it leans more toward reinforcing the need for LSTM in data assimilation, which somewhat repeats points already made in the introduction. Therefore, I recommend a major revision before publication.*

We thank the reviewer for their helpful comments. We appreciate the positive feedback on the introduction and methods, and we acknowledge the concerns raised. To improve our manuscript clarity and coherence we will modify part of the results sections and update Figures 3–6 to better align with the text, and we will add additional clarification around the structure of the LSTM algorithm. Please find in the following our response to each specific comment.

## Specific Comments

**Line 103–105:** *What is the source of the meteorological forcing data? Are they derived from gridded datasets?*

The meteorological forcing data used in this study are point-based and specific to each site. Further details are available in the references cited in Section 2.1.

**Table 2:** *The data time span for each site should be mentioned.*

To maintain a concise structure, we have included this information in the Appendix (see Table A1).

**Line 171:** *Forecasted model state is  $x_k^f$ .*

We acknowledge the ambiguity and will revise the sentence at line 171 as follows for clarity:

The Kalman gain  $\mathbf{K}_k$  in Equation (2) acts as a weighting factor, balancing the correction term (the innovation) by accounting for the relative uncertainties in the forecasted model state through the forecast error covariance matrix  $\mathbf{P}_k^f$  and in the observations through the observation covariance matrix  $\mathbf{R}_k$ .

**Line 277–278:** *Please clarify how the data were split: by individual data points or by continuous time spans?*

We split the data by continuous time spans using hydrological years (October 1st – September 30th). The revised sentence will read:

The available data were split by continuous time spans, using the hydrological year (from the 1st of October to the 30th of September) as the reference unit.

Specifically, the first 80% of the data, in terms of hydrological years, was allocated for training and testing using a 4:1 ratio, while the remaining 20% was reserved for testing.

**Line 276:** *Please clarify what are site-specific limits here*

We agree with the reviewer that the information given could benefit from additional explanation. Hence, we plan to add this sentence at line 276 :

Since the training process relies on a cost function that combines the RMSE with a penalty term enforcing physical bounds, the site-specific limits for each state component — namely, the dry and wet components of SWE, snow density, and albedo - were determined as physical bounds derived from historical data records. The historical records were initially pre processed following the distribution adjustment and scaling procedures described in Section 2.4.1.

**Line 288–290:** *Please use a formula to clarify this configuration. Do you mean that  $x_k^f$  and forcing at both time steps  $k$  and  $k-1$  are used as LSTM inputs in the second test? Please refer to Figure 2 for clarity.*

We plan to add a clarifying formula at Line 290. Here it is the suggested clarification :

In this second test configuration, the input vector  $\mathbf{I}$  at time step  $k$ , is constructed as follows:

$$\mathbf{I}_k = \begin{bmatrix} \mathbf{m}_k & \mathbf{m}_{k-1} & \mathbf{x}_{k-1}^{f*} \end{bmatrix} \quad (1)$$

where:

- $\mathbf{m}_k \in \mathbb{R}^d$ : the vector of meteorological forcing variables at time step  $k$  where  $d = 6$  is the number of forcing variables.
- $\mathbf{m}_{k-1} \in \mathbb{R}^d$ : the meteorological forcing at the previous time step  $k - 1$  (see fig (2) memory component element)
- $\mathbf{x}_{k-1}^{f*} \in \mathbb{R}^n$ : the model forecast at the previous time step  $k - 1$  (see fig (2) memory component element)

**Line 292–294:** *This part is confusing. What is the difference between Configuration 1 and Configuration 3? Was a single LSTM selected from Configuration 1 and then applied to other sites? Please clarify.*

We thank the reviewer for this helpful comment towards improving the comprehension of our work. To improve the manuscript we plan to re-write section 2.4.3 point 3 as follows :

While in the Configuration 1, separate LSTM models were trained and tested individually on each site using only site-specific data, in Configuration 3, we assessed the spatial transferability of these site-specific models by applying each LSTM trained on the low data sparsity sites (NGK, KHT, RME, FMI-ARC) to new data

from (i) the remaining 20% holdout portion of the low-sparsity sites not used during training, and (ii) high data sparsity sites (CDP and TRG). The WFJ site was excluded from this evaluation due to extensive gaps in its SWE time series. In this test we chose to use the LSTM setup with the best performances among prior tests, hence the one with memory components ( see point 2)

**Line 299–300:** *Is there a specific reason to randomly sample water years for data splitting rather than using a continuous historical time span to train the model and a continuous future time span to test it? Random sampling can create artificially easier test conditions by allowing test data (time period) to fall between training water years, which may provide the model with indirect information about future conditions.*

We understand the reviewer remark. We chose to randomly sample water years to develop a statistically robust algorithm with improved transferability across both temporal and spatial domains. Our goal was to avoid overfitting to long-term climate trends that may be present in a continuous historical time span, but that may not be representative of a warming future.

At the same time, by training and testing on entire water years, we ensure that snow-pack conditions reset annually, eliminating inter-annual dependencies. Finally, since we work with reanalysis data and aim to implement this as an operational tool, maintaining a strict future–past separation is less critical. Instead, our priority is to enhance model generalization and robustness across diverse conditions while minimizing bias from long-term temporal correlations in the training set.

***LSTM structure and hyperparameters were not mentioned in this work.***

We plan to add a paragraph at section 2.4:

In this study, we manually tuned the hyperparameters of the model, selecting the optimal configuration for each LSTM network. Below are the hyperparameters we fine-tuned:

- **Batch size:**

The batch size determines the number of training samples processed in a single forward and backward pass. A critical consideration when choosing the batch size is balancing computational efficiency with the quality of model outputs. To accommodate the size of the observation datasets for each site, we used a standard batch size of 128 for the sites of KHT and NG, and we reduced it each time selecting the most suitable value for optimal training performance on all the other datasets (Bishop & Bishop 2023).

- **Epochs:**

The number of epochs refers to the total number of complete passes through the training dataset. While a higher number of epochs allows the model to better capture complex patterns in the data, it also increases the risk of overfitting and computational cost. After experimenting with various configurations, we set the number of epochs to 500, allowing for sufficient learning while balancing efficiency .

- **Early Stopping Patience:**

Early stopping is a technique used to prevent overfitting by halting training

when the validation performance fails to improve for a specified number of epochs. In our case, we set the patience to 100, meaning that training would terminate if no improvement was observed in the validation performance for 100 consecutive epochs(Prechelt 2002).

- **Initial Learning Rate:**

The learning rate controls the step size during the optimization process. A higher learning rate accelerates convergence but may lead to instability, while a lower learning rate can slow down the learning process. Given the relatively small size of our datasets, we chose an initial learning rate of 0.01 to ensure rapid convergence during the early stages of training(Smith 2015).

- **Learning Rate Decay:**

To enhance convergence stability and prevent overshooting, we applied a learning rate decay factor of 1.5 periodically throughout training. This decay reduces the learning rate over time, allowing the model to fine-tune its parameters more effectively in the later stages of training.

- **Dense Layers:**

Each LSTM network used a single dense layer as the output layer. This dense layer was used to map the LSTM outputs to a fixed-size state vector. The number of neurons in this layer was set to 4, corresponding to the required output dimensions for each network(Murphy 2023).

- **Hidden LSTM Layers:**

We employed two distinct LSTM architectures based on the data sparsity at different sites. For dense sites, a single LSTM layer was used, resulting in a simple 2-layer architecture. This configuration was chosen under the assumption that the data contained enough patterns for the model to learn effectively without requiring excessive model depth. In contrast, for sparse sites, a deeper 3-layer LSTM architecture was implemented, which included two additional LSTM layers. This approach aimed to capture more complex dependencies within the data, thereby improving the model’s ability to learn from sparser temporal patterns(LeCun et al. 2015).

- **Hidden units per LSTM Layer:**

The number of hidden units in each LSTM layer determines the memory capacity of the model. For dense sites, the number was set to 500, allowing the model to learn from more intricate temporal dependencies. For sparse sites, the number was reduced to 100 to prevent overfitting, given the smaller and sparser datasets(Murphy 2023).

**Line 309–311 (Figure 3):** *Is this result from testing or operational testing? Please clarify*

To clarify that the results refer to an operational testing, we plan to add this sentence at the beginning of the section 3:

This section presents the results from the four configuration tests, based on the operational testing setup (see Fig. 2). Our objective was to replicate the actual

algorithm coupling mechanism required in a real-time setup, where the LSTM is used at each time step  $k$  to perform filtering.

**Line 313–314:** *It is somewhat difficult to distinguish the EnKF-DA and LSTM boxes in the plots. If the last box in each panel represents LSTM-DA, it suggests that the RMSE values of LSTM-DA for KHT, RME, and FMI-ARC increased compared to EnKF-DA, with KHT showing the largest increase. This appears inconsistent with the narrative presented here. Please check.*

We apologize for the low quality of the figure and the inconsistency with the text; we plan to modify the figures from 3 to 6 and particularly the sentence at line 313-318 to adhere more to the graph. The new version will be :

Only in the case of NGK site, the LSTM-DA was able to outperform both the open loop simulation and the EnKF-DA; At all the other dense sites ( KTH, RME, FMI-ARC), the mean RMSE increase relative to the EnKF for SWE estimation made by site specific LSTMs was within 10 mm (Figure 3, panel e). Similarly, the mean RMSE increase- averaged across sites- compared to the EnKF for snow depth estimation made by site specific LSTMs was equal to 6 cm (Figure 3, panel f). The only exception is the site of FMI-ARC where the LSTM-DA still underperformed compared to the EnKF, although the absolute values of RMSE are 1 order of magnitude lower than the ones on the other sites. The bias analysis (Figure 3, panel g and h) showed that snow depth exhibited a near zero bias, while the LSTM tended to overestimate SWE compared to the EnKF. However, both patterns were consistent in the EnKF and in the S3M open loop.

**Figures 3 & 4:** *The Nash-Sutcliffe coefficient can be used as a score to evaluate the accuracy of the time series in (a)–(d).*

We agree with the reviewer that an additional metric was needed to better evaluate the accuracy of the time series in Figures 3–6. We chose to include the RMSE, as it is a physical quantity that provides a more intuitive understanding of the actual snow values. While we appreciate the comment regarding the use of the Nash-Sutcliffe coefficient, we added the Kling-Gupta Efficiency (KGE) to be more suitable for our purposes, as it better captures both small and large discrepancies in the time series.

Having added the KGE to the Figure we plan to add a few sentences in the results section after line 330:

When it comes to evaluating the Kling-Gupta Efficiency (KGE) (Gupta et al. 2009), for sites with denser measurements, the values are comparable to those obtained with the EnKF-DA, supporting the observed improvement trend over the open loop simulation. Conversely, in the case of sparse datasets, the lower KGE values highlight the limitations of the LSTM in achieving performances comparable to the EnKF-DA.

After line 354 :

The KGE values, for both dense and sparse datasets, confirm that the memory component primarily acts as a smoother and enhances performance in most scenarios.

**Line 321–324:** *Why is the LSTM trained with outputs (states) from EnKF-DA more sensitive to the sparsity of observation data? Could you explain this here? Including observation data as an input may introduce artificial errors when filling in missing data in the input.*

The LSTM trained with EnKF-DA outputs is more sensitive to the sparsity of observational data because, unlike the EnKF, it lacks the flexibility to dynamically handle missing inputs. In the EnKF framework, the observation operator can be explicitly adjusted to account for the availability or absence of data at each time step, allowing assimilation to proceed even when observations are sparse. In contrast, the LSTM is trained in a supervised manner and requires a complete set of inputs (joint assimilation of SWE and snow depth) at every time step, making it more susceptible to performance degradation under irregular or incomplete observational conditions.

Data sparsity is a well-known challenge in cryospheric science. Therefore, future work will focus on increasing the model’s flexibility—exploring alternative neural network architectures, leveraging synthetic data, and explicitly tracking the artificial error such data may introduce.

Despite these limitations, our LSTM provides a lower-bound benchmark for performance, demonstrating the potential for improvement even under high-sparsity conditions—while maintaining the same advantage in computational cost reduction.

**Line 336–337:** *Only Figure 5b shows improvement with memory component, rather than c and d*

We apologize for the absence of coherence between the text and the figure, and we plan to modify the test to adhere to the updated version of the figure 5. Here is the proposed change from line 336 to line 340:

For datasets characterized by low data sparsity (NGK, KTH, FMI-ARC, RME), incorporating a memory component into the LSTM improved its ability to capture the seasonal dynamics of SWE and snow depth, particularly in accurately representing the timing and magnitude of peak SWE (see Figure 5, panels a and b). However, in some instances (see Figure 5, panels c and d), the memory component did not lead to a significant performance gain. Instead, it primarily acted as a smoother, dampening short-term fluctuations without substantially enhancing predictive accuracy.

**Line 344:** 0.5 m? The reduction shown in figure 6f is not that large.

We apologize for the mistake in the units of measurements. We will replace it with 0.5 cm

**Line 346:** *These strategies were not mentioned and explained in the method.*

The manual sampling we refer to involves the collection of in-situ SWE data at specific site locations. While we did not describe this process in detail—since it is already well documented in the reference papers for each site—we acknowledge that its brief mention here might be misleading. To clarify this point, we propose revising lines 345–346 as follows:

(e.g., 95%, WFJ and TRG – where the assimilated observations consist of manually measured SWE data, as detailed in the corresponding site references)

**Section 3.3:** *This result does not seem meaningful, as the spatial transferability of all models appears to be poor. Please consider removing it.*

To clarify, our results indicate that the LSTM model trained on the KHT site exhibits a degree of spatial transferability, in some cases even outperforming locally trained models at the test sites. However, we acknowledge the reviewer’s concern. Rather than suggesting meaningful spatial transferability at this stage, our intent was to demonstrate the attainment of promising performance with at least one algorithm, setting a lower bound for performances. These findings open new avenues for extending the framework toward a 2D implementation, which could better account for spatial variability and improve generalization across sites.

**Line 370–371:** *Any explanation for this result?*

To our understanding, during wet years, an increase in snow events is observed, which could potentially amplify uncertainties in the model due to cascade effects arising from both precipitation phase partitioning and initial condition uncertainties. Additionally, the formation of multiple snow layers, which may not be fully captured by the physics of our model, further contributes to these complexities. These factors could explain the observed lower performance of the multi-site LSTM during wet years. However, this hypothesis has not been fully tested, and any further explanation would require a comprehensive analysis. Nonetheless, we recognize the need for more detailed discussion, and therefore, we plan to add the following statement after line 371:

Reduced performances of the Multi-site LSTM simulation on snow water equivalent over wet years may be explained considering the difference in occurrence of snow events during those periods; indeed, in wet years, an increased number of snowfall events may introduce additional complexity and uncertainty, both due to the cascading effects of uncertainties in initial conditions and precipitation phase partitioning (Harder & Pomeroy 2014). Moreover, the formation of several snow layers may not be fully captured by S3M.

**Section 3.4:** *Instead of presenting the spatial transferability of a single model, it might be more meaningful to compare and discuss the site-specific LSTM and the multi-site LSTM. Please refer (this is not my work and no need to cite it.): Kratzert, Frederik, Martin Gauch, Daniel Klotz, and Grey Nearing. "HESS Opinions: Never train a Long Short-Term Memory (LSTM) network on a single basin." Hydrology and Earth System Sciences 28, no. 17 (2024): 4187-4201.*

We appreciate the reviewer’s comment and fully acknowledge the growing consensus in the hydrological literature advocating for multi-basin training as a means to achieve more robust and generalizable LSTM streamflow models. However, the purpose of presenting single-site snow results in our study was to explore the lower bounds of snow model performance in a transferability context. Specifically, we aimed to evaluate whether a model trained under such limited conditions could still outperform the open loop and perform comparably to traditional data assimilation techniques.

Among the available datasets, KHT represents the most suitable candidate for this analysis due to its long time series, higher data quality, and relatively large sample size. These attributes make it uniquely valuable for testing spatial transferability and informing the design of future distributed modeling efforts.

It is also important to note that S3M is not a lumped hydrological model, but a spatially distributed (gridded) snow model aimed at simulating snow water equivalent (SWE) across the terrain, rather than its integrated effect on streamflow at a basin outlet. As such, insights from streamflow-focused LSTM models may not transfer directly, given the differing computational units (catchments/basin vs. points/grid cells) and modeling goals.

That said, we agree that there is likely an advantage to training an LSTM-based snow model across multiple spatial locations, enabling the pooling of information in both space and time. That will be a topic of future research, and the transferability experiments in this paper are just a first tentative step in that direction.

To address the reviewer’s suggestion and clarify this intention, we will add the following sentence after line 360:

While recent studies (Kratzert et al. 2024) have strongly advocated for multi-basin training to achieve robust and generalizable LSTM streamflow models, we intentionally present the single-point case here for snow hydrology to establish a performance lower bound for snow spatial transferability—highlighting whether even such a constrained model can outperform the open loop and compare with traditional data assimilation approaches.

**Line 410:** *No results were shown to support this.*

We apologize for the lack of clarity around this point. While we did not present explicit results to support this, our intention was to explore the introduction of soft physical constraints in the cost function as a way to incorporate an inductive bias, as suggested in existing literature (Karniadakis et al. 2021), with the goal of enhancing model generalization. However, this approach did not lead to a notable improvement in model transferability. This suggests that the current level of physics integration may be insufficient, and future efforts should prioritize stronger physics adherence to better support generalization across sites.

we plan to change the sentence at line 410-411 to improve the quality:

In light of this, we introduced soft physical constraints into the cost function as a way to incorporate an inductive bias. Although this particular approach did not prove effective in significantly enhancing generalization, considerable potential remains in enforcing snow physical constraints in LSTMs (Charbonneau et al. 2024). Further research is needed in this direction to better understand how such constraints can support model generalization and physical consistency.

**Line 415:** *7 sites?*

Here we refer to the site-specific LSTM algorithm ( 1 without and 1 with memory features for all the 7 sites). However the text poorly clarify this aspects so we plan to change the sentence at line 415-416 in:

All but 2 out of the 14 site-specific LSTM frameworks significantly outperformed the Open Loop, although none outperformed the EnKF.



We plan to modify the manuscript according to these comments :

**Line 254:** Double “the”

**Line 271:** “predictions”

**Line 280:** *The inline formula here should not include 'star,' as 'star' was previously used to represent the LSTM output, not the input from S3M. Please keep consistent.*

**Line 342–348:** *Cite Figure 6 here.*

## References

- Bishop, C. M. & Bishop, H. (2023), *Deep learning: Foundations and concepts*, Springer Nature.
- Charbonneau, A., Deck, K. & Schneider, T. (2024), ‘A physics-constrained neural differential equation framework for data-driven snowpack simulation’, *arXiv preprint arXiv:2412.06819*.
- Gupta, H. V., Kling, H., Yilmaz, K. K. & Martinez, G. F. (2009), ‘Decomposition of the mean squared error and nse performance criteria: Implications for improving hydrological modelling’, *Journal of hydrology* **377**(1-2), 80–91.
- Harder, P. & Pomeroy, J. W. (2014), ‘Hydrological model uncertainty due to precipitation-phase partitioning methods’, *Hydrological Processes* **28**(14), 4311–4327.
- Karniadakis, G. E., Kevrekidis, I. G., Lu, L., Perdikaris, P., Wang, S. & Yang, L. (2021), ‘Physics-informed machine learning’, *Nature Reviews Physics* **3**(6), 422–440.
- Kratzert, F., Gauch, M., Klotz, D. & Nearing, G. (2024), ‘Hess opinions: Never train a long short-term memory (lstm) network on a single basin’, *Hydrology and Earth System Sciences* **28**(17), 4187–4201.
- LeCun, Y., Bengio, Y. & Hinton, G. (2015), ‘Deep learning’, *nature* **521**(7553), 436–444.
- Murphy, K. P. (2023), *Probabilistic Machine Learning: Advanced Topics*, MIT Press.  
**URL:** <http://probml.github.io/book2>
- Prechelt, L. (2002), Early stopping-but when?, in ‘Neural Networks: Tricks of the trade’, Springer, pp. 55–69.
- Smith, L. N. (2015), ‘Cyclical learning rates for training neural networks. arxiv’, *Preprint at https://arxiv.org/abs/1506.01186*.
